# Supplementary material
Source: publisher site journal article supplement (https://www.degruyterbrill.com/publication/isbn/9783110289084/downloadAsset/9783110289084_Inhaltsverzeichhnis.pdf)
Supplement: Supplementary file 1 [file 9783110289084_Inhaltsverzeichhnis.pdf]

# Inhaltsübersicht

|                                 |    |
|---------------------------------|----|
| Abkürzungsverzeichnis . . . . . | IX |
|---------------------------------|----|

## AKTIENGESETZ

### ERSTES BUCH AKTIENGESELLSCHAFT

#### Sechster Teil Satzungsänderung

#### Maßnahmen der Kapitalbeschaffung und Kapitalherabsetzung

|                          |                                                                                        |            |
|--------------------------|----------------------------------------------------------------------------------------|------------|
| <i>Zweiter Abschnitt</i> | Maßnahmen der Kapitalbeschaffung . . . . .                                             | §§ 182–221 |
| Fünfter Unterabschnitt   | Wandelschuldverschreibungen. Gewinnschuld-<br>verschreibungen . . . . .                | § 221      |
| <i>Dritter Abschnitt</i> | Maßnahmen der Kapitalherabsetzung . . . . .                                            | §§ 222–240 |
| Erster Unterabschnitt    | Ordentliche Kapitalherabsetzung . . . . .                                              | §§ 222–228 |
| Zweiter Unterabschnitt   | Vereinfachte Kapitalherabsetzung . . . . .                                             | §§ 229–236 |
| Dritter Unterabschnitt   | Kapitalherabsetzung durch Einziehung<br>von Aktien. Ausnahme für Stückaktien . . . . . | §§ 237–239 |
| Vierter Unterabschnitt   | Ausweis der Kapitalherabsetzung . . . . .                                              | § 240      |
